# Supplementary material
Source: PubMed Central journal article supplement (PMC6222195)
Supplement: zjb999094916s1.pdf [file zjb999094916s1.pdf]

**The assembly order of flagellar rod subunits in *Bacillus subtilis***

**Andrew M. Burrage, Eric Vanderpool, Daniel B. Kearns\***

Department of Biology

Indiana University

Bloomington, IN 47405

\*corresponding author

dbkearns@indiana.edu

1-812-856-2523

**Supplemental Material**

**Table S1. Plasmids**

| Plasmid | Genotype                                       |     |
|---------|------------------------------------------------|-----|
| pAH25   | <i>amyE::spec erm amp</i>                      | (1) |
| pAMB1   | <i>amyE::P<sub>fla/che</sub> cat amp</i>       |     |
| pAMB3   | <i>amyE::P<sub>fla/che</sub>-flgC cat amp</i>  |     |
| pAMB4   | <i>amyE::P<sub>fla/che</sub>-fliE cat amp</i>  |     |
| pDG364  | <i>amyE::cat amp</i>                           | (2) |
| pEV1    | <i>amyE::P<sub>fla/che</sub>-flgB spec amp</i> |     |
| pEV2    | <i>SUMO-flgB amp</i>                           |     |
| pEV3    | <i>SUMO-flgC amp</i>                           |     |
| pEV4    | <i>SUMO-flhO amp</i>                           |     |
| pEV5    | <i>SUMO-flhP amp</i>                           |     |
| pKRH12  | <i>SUMO-fliE amp</i>                           |     |
| pTB146  | <i>6His-SUMO amp</i>                           | (3) |

## Table S2. Primers

| Primer | Sequence                                               |
|--------|--------------------------------------------------------|
| 3041   | AGGAGGGATCCCGTTTACAAGATCAATTCAATGACG                   |
| 3042   | CTGCTGAATTCAGCTCTTGTCGTATCCATATTTGCT                   |
| 3150   | AGGAGGCTCTTCAGGTAGCTTATTTCTGGAACGATAC                  |
| 3151   | CTCCTCTCGAGTCACCTGCTTAGCTCTTGTC                        |
| 3152   | AGGAGGCTCTTCAGGTACAGCTTTTCATAGCTTAAATGTTTC             |
| 3153   | CTCCTCTCGAGCTCATTTAACGAACTAATAGAG                      |
| 3154   | AGGAGGCTCTTCAGGTTTAAAAGGATTATATACAGCAACA               |
| 3155   | CTCCTCTCGAGGAATTGCTGTCTGACAAGCTC                       |
| 3156   | AGGAGGTCGACTCAGGTCAATGCTAACGGC                         |
| 3157   | CTCCTGGATCCCTGCTCGAATATGTGCTTGAA                       |
| 4198   | AGGAGGCTCTTCCGGTATGAATGTGATTAATGCAATTTCT               |
| 4199   | AGGAGCTCGAGCCCCGGTCATTCCACTCTT                         |
| 4773   | CCTCCTGGGATCCGGCTATTGTTTACTTGATTTGTTGC                 |
| 4775   | CCTCCTGGATCCCCACTCTTTCTCTAAATCGTCAGAC                  |
| 4797   | AGGAGGCAATTGAGGTACTTATATCAAGGTACTAA                    |
| 4798   | CCTCCTGGATCCTAGGCTAGCATCGAATTCTCACCCCTCAATATCCTTGTCGAG |
| 4799   | AGGAGGGAATTCGAACGGTAAATTTAATTCGCTGAA                   |
| 4800   | AGGAGGGAATTCGGGAATGCTGATGAAGGCGTTAG                    |

### Supplemental references

1. **Guérout-Fleury AM, Frandsen N, Stragier P.** 1996. Plasmids for ectopic integration in *Bacillus subtilis*. *Gene*. **180**:57-61.
2. **Antoniewski C, Savelli B, Stragier P.** 1990. The *spoIIIJ* gene, which regulates early developmental steps in *Bacillus subtilis*, belongs to a class of environmentally responsive genes. *J. Bacteriol.* **172**:86-93.
3. **Bendezu FO, Hale CA, Bernhardt TG, de Boer PA.** 2009. RodZ (YfgA) is required for proper assembly of the MreB actin cytoskeleton and cell shape in *E. coli*. *EMBO J.* **28**:193–204.

Figure S1

```
Sen_FlgB 1 MLDRLDAALRFQQFALNLRACRQELILANIANADTFGYQARDIDFASELKKVMVGRGREETGGVALTLTSSHEIPA-QAVS----SFAVDLLYRVP
Bbu_FlgB 1 -MNDERSVDFESHRYLDVLSLRQSVISDNIANVDTPNFKRSKISFSELEKAFLNEDKND--TNLIKSSDKHLSSGFKNLKYSDVKPH--RVLDDHF
Bsu_FlgB 1 -MSLRSGETQNLLENALS RADIKQKVIENNIANIDTPNYKAKKVSQNLDDQES-----SR--TEAIKTD-----YRHVDFSDTDSNYSYTVASGD

Sen_FlgB 91 DQPSLDGNTVDMRERFQFADNSLKYQMGLTVLGSQLKGMNNVLCQGN
Bbu_FlgB 91 STMNNGNNDVDSSEVKALVQNMVHMLMTNVAHYFKSINIVL---
Bsu_FlgB 82 TSYQQNGNNDVDKEMTELAQNCINYCALVERMNGKENS LKTLVTEGCK

Sen_FlgC 1 MALLNIFDIAGSALAAQSKRLNVAASNLANADSVTG---PDGQPYRAKQVVEQV-----DAAPGQATGQVKKVASVIESQAFKLV
Bbu_FlgC 1 MGLFSINIVASTGTAQRLRIDVHSNNANVSTSR---PDGGPYRRQRIEAPRVNNPYWKGPF-IPDYLNDNGTQGVFVASTKDKSELKLEK
Bsu_FlgC 1 MTAFFSLNVSASALTAQRVRMDVSSNLANMDTRAKQVNGEWVYRRKMVSLQSKGES--FSSILNSQMSGSGNAGNGVKVSKITEDDSDDFNLV

Sen_FlgC 78 YEPGNFLA---DANCYVKMPNVDVCEMVNFMASRSYQANIEVLTNTVKSMMKKTITLTCO-
Bbu_FlgC 91 YDPAHPDSISSGDKGYVLEPNVNLVEMVDMISASRAYEANSVTVHNSKSMFRSALATLQO
Bsu_FlgC 94 YDPTDPDA---NAGEYVQKPNVDPLKREMVLDVSSTRSYEAVNTAMNATKGMMLKALRIGK-

Sen_FlgF 1 MDHALYTMCAASQTLNQAVTASNLANASTPCERAGLNALRAVPVDGLSLA-----FRTLLVTASTPC-----ADMTPCQLDVT
Bbu_Flh0 1 MVRGLYTAASGMMARERKLDTVSNNLANIDLGYKRDLSIQAFPEMLIRRLNDDGLYKFPKCHLEAPVVCKIGTGVBEENIYTVFEQGPLKRT
Bsu_Flh0 1 MLKGEYTAASAMIAQQRREMLSNNIANANTSGYKADQGSMPAPPEMLLSRIESKSPA---CT--SRETGCVNTEGVYMOELKPLFTQGLSKST

Sen_FlgF 75 SRPLDVALQOD-----GWLVVQAAADGAEYTRNGNIQVGPTEGOLTI-QGHPVIG-EGGPIVPEGSEITLAAAGTISALNP--GDPP
Bbu_Flh0 96 GNPLDLALTDQ-----GFFVHTQSDG-ERYTRNGSFTIGKCGILVTKSGFPVVG-EKGYHYLKK-NNFKITPQGVFHNNSFESDPK
Bsu_Flh0 90 DQPTDHALIENQVMSAETNEKAALFYFVQTADG-IRYSKSTFSLNENNQLTI-NGREPILS TDRQPI TVDN-ENFTVSNGTVTITNGTA---

Sen_FlgF 153 NTV-----APVGRLK-----LVKAEAGNEVQRSDGLFRLTAEAQAERGAVLADPSIRIEMSGVLEGSNVKPVAMTDMIANARRFEM
Bbu_Flh0 175 RLVS EYENSWENYELLDTRIVNFENRFLKQKQNSIWI DTKTSK-----AQEIDISIRPKIETETLEASNVNAYKEMVLMIEINRAYEA
Bsu_Flh0 178 -----GQDVRMAEDVRNLRKRDGNLDYSTADGNDLPSA----AGNNQVAYSI---KQGVSELSNVDDVTSAYTEMTAYRSFBA

Sen_FlgF 230 QMKVITSVDENEGRANQLLSMS
Bbu_Flh0 261 NQKTITQTEDSLLEKLINEIGKY
Bsu_Flh0 249 NQKVIQAYDKSMDKANEIGKI

Sen_FlgG 1 MISSLWIAKTCLDAAQTNMDVIANLANVSTNGFKRQRAVFEDLLYOTHRQPCAQSSEOTTLPSGLQHCTGVRPVA TERLHSQGNISQTNNSKV
Bbu_FlgG 1 MMRALWTAASGMTAQQVNVDTLANNLSNVNTGFKKIRAEFEDLLYQTHNRAEPATENTLRELGNQVGHGFKIAATQRHEOGKMQSTNLLTDV
Bsu_FlhP 1 MLKGEYTAASAMIAQQRREMLSNNIANANTSGYKADQGSMPAPPEMLLSRIESKSPA---CT--SRETGCVNTEGVYMOELKPLFTQGLSKST

Sen_FlgG 96 AIKG-----QGFQVMLPDGTSAYTRDGSFQVQONGQVLTAGGFQVQPAITIPANAL--SITIGRQGVVSVTQGGQAAFPVQVQGLNL
Bbu_FlgG 96 AIEG-----DGFYKILLPDGTYAYTRDGSFKLDNDRNLVTSQGYKVLNPLFFPEYIQNSITISEEGIVSVKIDTNSNEPIELGQTEI
Bsu_FlhP 96 ALIENQVPMASAEETNEKAALFYFVQTADG-IRYSKSTFSLNENNQLTINGR-PIHSTDRQPI TVDNENFTVSENGT VTTNG-----RTAGQIDV

Sen_FlgG 176 TTFMNDTGLEESIGENLYIETQSSGAPNESTPGLNGAGLLYQGYVETSNVNVABELVNMIOVQRAYEINSKAVSTTDQMLQKLTQL---
Bbu_FlgG 178 SRFLNPAGLSAIGSNLEKETAGSGQEIAGIPGSEGMRGLRQGIEMSNVSIABEMVMTMIVAQRAYEINSKAIQTSNMLGLANNKRRQ-
Bsu_FlhP 183 RMAEDVRNKRKRDNDLVSSTADGNDLPSAAG-NNQVAYSLSKQGVSELSNVDDVTSAYTEMTAYRSFEANQKVIQAYDKSMDKANEIGKI

Sen_FlgE 1 --MSFSQAVSGLNAAATNLDVIGNNIANSATYGFKSGTASADMFAGS-----KVLGKVKVAGITQDFDGTITNTGRGLDVA
Bbu_FlgE 1 MMRSLYSGVSLONHOTRMDVGNNIANVNTGFKKRVNFQDMISOSISGASRPTDARGCCTNPKOVGLGMNVASHDTIHTQCAFQSTQKASDLG
Bsu_FlgE 1 MLRSLYSGTSGMRNFQTKLDVIGNNIANVNTGFKKRVNFKDMVSOITAGGSAAGATTGGTNSKQVGLGSSSGTIDTIHSTATQSTGRDLDA

Sen_FlgE 77 ISONGFFRLVDSNGSVFYGRNGQFKLDENRNLVNM-QCMQLTGYPTGTPT--TQGANPAPITIPNTL-MAAKSTTTASMQIINLSTDFVPSK
Bbu_FlgE 96 VSGNGFFLKEG-KNLFYTRACAFDVSDDRHLVNPANGMRIQGMWARDLEGEKVINTASDIEDLIIPIGDKEGAKSTKNVVFACNLDRKLELIDQ
Bsu_FlgE 96 IDCDGFRDTEG-DGTAYTRAGNFYLDNTGTLVITGD-----GYHVLNMGGTI---KIFP

Sen_FlgE 168 T--PFSVSDADSYNKKGTVTYVDSQGNAHDMNVYFVRT--KDNEWAVYTHDSSDPAATAPTTASTTLKFNENGLIES-----
Bbu_FlgE 190 GASPADIAARG---TWVVKSLYDSFGNVSVLELRVVKDLNTPNLWATVINGE-----QNSNFTLGFDFNEGALASLNGQPQKGDILQIPITF
Bsu_FlgE 147 -----DAQTFSTGSDGK-----

Sen_FlgE 241 -----GCTVNETTGTINGATAATFSLSFLNSMOQNTGANNIVATNONGYKPGDLVSVQINNDGTVVGNYSNEQEQVLGQIVLANFANN
Bbu_FlgE 276 NVLGANVGEVGEQQTVNLKLGTVG-----SYTDSITQFADSSSTKAIIDQGYGMGYMENYEDQNGVTVGIVSNGIRRDLEKIALASFMNP
Bsu_FlgE 159 -----VSIVDAECKTODGGOIGIVTFANS

Sen_FlgE 324 EGLASQGDNVAAATQASGVA-LLGTAGSCNFKLITNGALEASNVLDLSEKLVNMIVAORNYOSNAOTIKTQDQILNITLVNLR-
Bbu_FlgE 362 GGLARSGDTNFVETSNSGOVR-IGETGLAGLQDIRSGVLEMANVDLAEQFTDMI VTORGFQANAKTITTSDDQLQELVRLKN
Bsu_FlgE 183 DGLDRTCSNLYRESLNSGTASAANQPDGCTGALKSGFLEMSNVDLTDEFTMIVAORGFQSN SKIITTSDELLQELVNLKR

Sen_FliE 1 MAAGQHEGVIS-----QL-----QATAMAARGQDHSQSTVSEFAGOLHAALDRISDRQAARVQAQKFTLGEPEGTALNDVMADMKASVSMQM
Bbu_FliE 1 --MV-RTDAFFTENNINLVKKNPLHFDVNLFSKSNKAKDNDIKTEKDVLENSITDGVNKSQNLNVSKVTEQAIKPPSSLDVHDVVIAMSKANMNLST
Bsu_FliE 1 --MINALISPEQVQNTQ-----NATNVQNSNQRKDSNQTSSELLEKNSISLLENSQVASDNMNTAL-AAGKDVNLDEVMIAQKASISLTA

Sen_FliE 93 GIOVRNKLVAAYQEVMSMQV
Bbu_FliE 85 LKAIVVERGVKAYQDIIINIR-
Bsu_FliE 87 ATEFRNKAVBAYQEIIMRMQV
```

Figure S1: Genetic alignment of *B. subtilis* rod proteins. Sequences of *B. subtilis* FlgB, FlgC, FlhO, FlhP, FlgE, and FliE (Bsu) were aligned with homologous rod and hook proteins from *Salmonella enterica* serovar *Typhimurium* (Sen) and *Borrelia burgdorferi* (Bbu).

## Figure S2

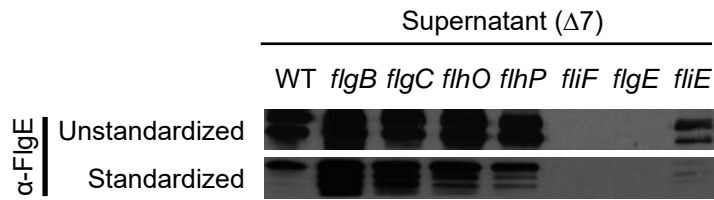

**Figure S2: The *fliE* mutant reduces flagellar type III secretion.** Western blot analyses of the hook protein FlgE in TCA precipitated supernatants. Precipitated pellets were resuspended to 100 OD units based on the OD<sub>600</sub> of the culture at time of supernatant isolation. Samples were loaded with equal volumes (top panel) or standardized to a total protein concentration of 35 mg/ml and equally loaded (bottom panel). Samples were generated as described in Materials and Methods using the following strains: DK4537 ( $\Delta 7$ ), DK4540 ( $\Delta 7 \Delta flgB$ ), DK4541 ( $\Delta 7 \Delta flgC$ ), DK4542 ( $\Delta 7 \Delta flhO$ ), DK4543 ( $\Delta 7 \Delta flhP$ ), DK4544 ( $\Delta 7 \Delta flgE$ ), DK4538 ( $\Delta 7 \Delta fliF$ ), and DK4539 ( $\Delta 7 \Delta fliE$ ).
